# Supplementary material for: Machine learning-based integration develops an immune-derived lncRNA signature for improving outcomes in colorectal cancer
Source: PubMed Central journal article supplement (PMC8831564; doi:10.1038/s41467-022-28421-6), 2022-02-10
Supplement: 41467_2022_28421_MOESM2_ESM.pdf [file 41467_2022_28421_MOESM2_ESM.pdf]

## **Description of Additional Supplementary Files**

**Supplementary Data 1.** A total of 791 lncRNAs was identified via ImmLnc algorithm.

**Supplementary Data 2.** The performance of 101 predictive models in training and testing cohorts.

**Supplementary Data 3.** The evaluation metrics of IRLS in training and testing cohorts.

**Supplementary Data 4.** A total of 109 published signatures were retrieved from the literatures.

**Supplementary Data 5.** Details of baseline information in 17 public datasets and an in-house dataset.

**Supplementary Data 6.** The forward and reverse primers for qRT-PCR.
